# Supplementary material for: The status and future directions of comprehensive tobacco control policies for the 2020 Tokyo Olympic Games: A review
Source: PubMed Central journal article supplement (PMC6751969; doi:10.18332/tid/105453), 2019-04-01
Supplement: TID-17-24-s1.pdf [file TID-17-24-s1.pdf]

**Table 3 Protecting people from tobacco smoke, tobacco advertising, promotion and sponsorship in 17 hosting Olympic games countries**

|                                                                          | Argentina | Brazil | Canada | USA | Austria | France | Greece | Italy | Norway | Spain | UK  | Australia | China | Japan | Korea | Singapore | Russia |
|--------------------------------------------------------------------------|-----------|--------|--------|-----|---------|--------|--------|-------|--------|-------|-----|-----------|-------|-------|-------|-----------|--------|
| <b>Protecting people from tobacco smoke (Not Applicable = NA)</b>        |           |        |        |     |         |        |        |       |        |       |     |           |       |       |       |           |        |
| Number of places smoke-free                                              | 8         | 8      | 8      | 1   | 1       | 3      | 8      | 0     | 7      | 8     | 8   | 8         | 1     | 0     | 2     | 5         | 8      |
| Fines for violations                                                     | Yes       | Yes    | Yes    | No  | Yes     | Yes    | Yes    | Yes   | Yes    | Yes   | Yes | No        | No    | No    | Yes   | Yes       | Yes    |
| Fines on the establishment                                               | Yes       | Yes    | Yes    | NA  | Yes     | Yes    | Yes    | Yes   | Yes    | Yes   | Yes | NA        | NA    | NA    | Yes   | Yes       | Yes    |
| Fines on the patron                                                      | No        | No     | Yes    | NA  | Yes     | Yes    | Yes    | Yes   | Yes    | Yes   | Yes | NA        | NA    | NA    | Yes   | Yes       | Yes    |
| Dedicated funds for enforcement                                          | Yes       | No     | Yes    | No  | No      | No     | No     | No    | No     | No    | No  | No        | No    | No    | Yes   | No        | No     |
| Citizen complaints and investigations                                    | Yes       | Yes    | Yes    | No  | Yes     | No     | Yes    | Yes   | No     | Yes   | Yes | No        | No    | No    | No    | Yes       | No     |
| Subnational smoking bans - authority exists                              | Yes       | Yes    | Yes    | Yes | Yes     | No     | No     | No    | No     | Yes   | Yes | Yes       | Yes   | Yes   | No    | NA        | No     |
| Comprehensive bans in place subnationally                                | No        | No     | Yes    | Yes | No      | NA     | NA     | NA    | NA     | No    | Yes | Yes       | Yes   | No    | NA    | NA        | NA     |
| Last updated: 2015-09-02                                                 |           |        |        |     |         |        |        |       |        |       |     |           |       |       |       |           |        |
| <b>Tobacco advertising (Banned = Yes, Allowed = No)</b>                  |           |        |        |     |         |        |        |       |        |       |     |           |       |       |       |           |        |
| National TV and radio                                                    | Yes       | Yes    | Yes    | Yes | Yes     | Yes    | Yes    | Yes   | Yes    | Yes   | Yes | Yes       | Yes   | No    | Yes   | Yes       | Yes    |
| International TV and radio (broadcast from abroad, including satellite)  | Yes       | Yes    | Yes    | Yes | Yes     | Yes    | Yes    | Yes   | Yes    | Yes   | Yes | Yes       | Yes   | No    | Yes   | Yes       | Yes    |
| Local magazines and newspapers                                           | Yes       | Yes    | No     | No  | Yes     | No     | Yes    | Yes   | No     | Yes   | Yes | Yes       | Yes   | No    | Yes   | Yes       | Yes    |
| International magazines and newspapers                                   | Yes       | Yes    | Yes    | No  | Yes     | Yes    | Yes    | Yes   | Yes    | Yes   | Yes | Yes       | Yes   | No    | No    | Yes       | Yes    |
| Billboards and outdoor advertising                                       | Yes       | Yes    | No     | No  | Yes     | No     | No     | No    | No     | No    | No  | No        | Yes   | No    | No    | Yes       | Yes    |
| Point of sale                                                            | Yes       | Yes    | Yes    | No  | Yes     | Yes    | Yes    | Yes   | Yes    | Yes   | Yes | Yes       | No    | No    | Yes   | Yes       | Yes    |
| Internet                                                                 | No        | Yes    | No     | No  | No      | No     | No     | Yes   | Yes    | Yes   | No  | No        | No    | No    | No    | Yes       | Yes    |
| <b>Promotion and sponsorship (Banned = Yes, Allowed = No)</b>            |           |        |        |     |         |        |        |       |        |       |     |           |       |       |       |           |        |
| Free distribution of tobacco products in the mail or through other means | Yes       | Yes    | Yes    | No  | No      | Yes    | Yes    | No    | Yes    | Yes   | Yes | No        | No    | No    | No    | Yes       | Yes    |
| Promotional discounts                                                    | Yes       | Yes    | Yes    | No  | Yes     | Yes    | No     | No    | Yes    | Yes   | Yes | No        | No    | No    | No    | Yes       | Yes    |
| Non-tobacco goods and services identified with tobacco brand names       | Yes       | Yes    | No     | No  | No      | Yes    | No     | No    | No     | Yes   | Yes | Yes       | No    | No    | No    | No        | Yes    |
| Brand name of non-tobacco products used for tobacco product              | Yes       | Yes    | No     | No  | No      | No     | No     | No    | Yes    | Yes   | Yes | No        | No    | No    | No    | No        | Yes    |
| appearance of tobacco brands in TV and/or films (product placement)      | Yes       | Yes    | Yes    | No  | No      | Yes    | Yes    | No    | Yes    | Yes   | Yes | No        | No    | No    | No    | Yes       | Yes    |
| Last updated: 2015-08-19                                                 |           |        |        |     |         |        |        |       |        |       |     |           |       |       |       |           |        |

**Table 4 Offer help to quit tobacco use in 17 hosting Olympic games countries**

|                                                                                                                                                                                            | Argentina | Brazil  | Canada  | USA     | Austria | France  | Greece  | Italy   | Norway  | Russia  | Spain   | UK      | Australia | China   | Japan   | Korea   | Singapore |
|--------------------------------------------------------------------------------------------------------------------------------------------------------------------------------------------|-----------|---------|---------|---------|---------|---------|---------|---------|---------|---------|---------|---------|-----------|---------|---------|---------|-----------|
| <b>Treatment for tobacco dependence (Fully = F, Partially= P, Yes, in some = Yes, is, Yes, in most= Yes, im, Not Applicable = NA)</b>                                                      |           |         |         |         |         |         |         |         |         |         |         |         |           |         |         |         |           |
| Access to a toll-free quit line                                                                                                                                                            | Yes       | Yes     | Yes     | Yes     | Yes     | No      | No      | Yes     | Yes     | Yes     | No      | Yes     | Yes       | No      | No      | Yes     | Yes       |
| Treatment for tobacco dependence available in hospitals                                                                                                                                    | Yes, im   | Yes, is | Yes, im | Yes, is | Yes, is | Yes, im | Yes, is | Yes, is | Yes, is | Yes, is | Yes, is | Yes, im | Yes, im   | Yes, is | Yes, is | Yes, is | Yes, im   |
| Treatment for tobacco dependence in hospitals cost covered                                                                                                                                 | F         | F       | P       | P       | P       | P       | P       | P       | F       | No      | F       | F       | P         | P       | P       | P       | P         |
| Treatment for tobacco dependence available in offices of health professionals                                                                                                              | Yes, is   | Yes, im | Yes, im | Yes, is | Yes, is | Yes, is | Yes, is | Yes, is | Yes, is | Yes, is | Yes, is | Yes, im | Yes, im   | Yes, is | No      | NA      | Yes, is   |
| Treatment for tobacco dependence in offices of health professionals cost covered                                                                                                           | P         | No      | P       | P       | P       | P       | P       | No      | No      | F       | F       | F       | P         | P       | NA      | NA      | P         |
| Treatment for tobacco dependence available in the community                                                                                                                                | Yes, is   | Yes, is | Yes, is | Yes, is | Yes, is | NA      | No      | Yes, is | Yes, is | No      | Yes, is | Yes, im | Yes, is   | Yes, is | Yes, is | NA      | Yes, is   |
| Treatment for tobacco dependence in the community cost covered                                                                                                                             | P         | No      | No      | P       | NA      | NA      | NA      | No      | No      | NA      | P       | F       | NA        | No      | P       | NA      | P         |
| Treatment for tobacco dependence available in other settings                                                                                                                               | No        | Yes, is | Yes, is | No      | Yes, is | Yes, is | Yes, is | Yes, is | Yes, is | Yes, is | Yes, is | Yes, is | Yes, is   | No      | No      | NA      | Yes, is   |
| Treatment for tobacco dependence in other settings cost covered                                                                                                                            | NA        | No      | P       | NA      | P       | P       | P       | P       | P       | F       | No      | F       | P         | NA      | NA      | NA      | P         |
| Treatment for tobacco dependence available in health clinics or other primary care facilities                                                                                              | Yes, im   | Yes, is | Yes, im | Yes, is | Yes, is | Yes, is | Yes, is | Yes, is | Yes, is | Yes, is | Yes, is | Yes, im | Yes, im   | Yes, is | Yes, is | Yes, is | Yes, im   |
| Treatment for tobacco dependence in health clinics or other primary care facilities cost covered                                                                                           | F         | F       | P       | P       | P       | P       | P       | P       | P       | F       | F       | F       | P         | P       | P       | P       | P         |
| Last updated: 2015-09-02                                                                                                                                                                   |           |         |         |         |         |         |         |         |         |         |         |         |           |         |         |         |           |
| <b>Medication (Fully = F, Partially= P, In a pharmacy without a prescription = P wo p, In a general store without a prescription = Gs wo p, In a pharmacy with a prescription = P w p)</b> |           |         |         |         |         |         |         |         |         |         |         |         |           |         |         |         |           |
| Nicotine replacement therapy - legally sold                                                                                                                                                | Yes       | Yes     | Yes     | Yes     | Yes     | Yes     | Yes     | Yes     | Yes     | Yes     | Yes     | Yes     | Yes       | Yes     | Yes     | Yes     | Yes       |
| Nicotine replacement therapy - place available                                                                                                                                             | P         | P       | P       | Gs      | P       | P       | P       | P       | P       | P       | P       | Gs      | Gs        | P       | P       | P       | P         |
| Nicotine replacement therapy - cost covered                                                                                                                                                | P         | F       | P       | P       | No      | P       | No      | No      | No      | No      | No      | F       | P         | No      | P       | P       | P         |
| Nicotine replacement therapy on the Essential Medicines List                                                                                                                               | No        | Yes     | No      | NA      | No      | Yes     | No      | No      | No      | Yes     | Yes     | NA      | Yes       | No      | Yes     | No      | No        |
| Bupropion - legally sold                                                                                                                                                                   | Yes       | Yes     | Yes     | Yes     | Yes     | Yes     | Yes     | Yes     | Yes     | No      | Yes     | Yes     | Yes       | Yes     | No      | Yes     | Yes       |
| Bupropion - place available                                                                                                                                                                | P         | P       | P       | P       | P       | P       | P       | P       | P       | NA      | P       | P       | P         | P       | NA      | P       | P         |
| Bupropion - cost covered                                                                                                                                                                   | w p       | w p     | w p     | w p     | w p     | w p     | w p     | w p     | w p     | w p     | w p     | w p     | w p       | w p     | w p     | w p     | w p       |
| Varenicline - legally sold                                                                                                                                                                 | Yes       | Yes     | Yes     | Yes     | Yes     | Yes     | Yes     | Yes     | Yes     | Yes     | Yes     | Yes     | Yes       | Yes     | Yes     | Yes     | Yes       |
| Varenicline - place available                                                                                                                                                              | P         | P       | P       | P       | P       | P       | P       | P       | P       | P       | P       | P       | P         | P       | P       | P       | P         |
| Varenicline - cost covered                                                                                                                                                                 | w p       | w p     | w p     | w p     | w p     | w p     | w p     | w p     | w p     | w p     | w p     | w p     | w p       | w p     | w p     | w p     | w p       |
|                                                                                                                                                                                            | P         | No      | P       | P       | No      | No      | No      | No      | No      | No      | No      | F       | P         | No      | P       | P       | No        |

Last updated: 2015-09-11

**Table 5 Warn about the dangers of tobacco in 17 hosting Olympic games countries**

|                                                                                                                        | Argentina | Brazil | Canada | USA | Australia | France | Greece | Italy | Norway | Russia | Spain | UK  | Australia | China | Japan | Korea | Singapore |
|------------------------------------------------------------------------------------------------------------------------|-----------|--------|--------|-----|-----------|--------|--------|-------|--------|--------|-------|-----|-----------|-------|-------|-------|-----------|
| <b>Health warning labels on cigarette packages</b>                                                                     |           |        |        |     |           |        |        |       |        |        |       |     |           |       |       |       |           |
| Law mandates that health warnings appear on tobacco packages                                                           | Yes       | Yes    | Yes    | Yes | Yes       | Yes    | Yes    | Yes   | Yes    | Yes    | Yes   | Yes | Yes       | Yes   | Yes   | Yes   | Yes       |
| Percentage of principal display area mandated to be covered by health warnings - front and back of cigarette packaging | 50        | 65     | 75     | 50  | 35        | 35     | 35     | 35    | 35     | 40     | 35    | 35  | 82.5      | 30    | 30    | 30    | 50        |
| Percentage of principal display area mandated to be covered by health warnings - front of cigarette packaging          | 50        | 30     | 75     | 50  | 30        | 30     | 30     | 30    | 30     | 30     | 30    | 30  | 75        | 30    | 30    | 30    | 50        |
| Percentage of principal display area mandated to be covered by health warnings - back of cigarette packaging           | 50        | 100    | 75     | 50  | 40        | 40     | 40     | 40    | 40     | 50     | 40    | 40  | 90        | 30    | 30    | 30    | 50        |
| Does the law mandate specific health warnings on cigarette packaging?                                                  | Yes       | Yes    | Yes    | Yes | Yes       | Yes    | Yes    | Yes   | Yes    | Yes    | Yes   | Yes | Yes       | Yes   | Yes   | Yes   | Yes       |
| How many health warnings are approved by the law for cigarette packaging?                                              | 10        | 9      | 16     | 9   | 16        | 16     | 16     | 16    | 16     | 13     | 16    | 16  | 14        | 3     | 8     | 1     | 6         |
| Do health warnings appear on each cigarette package and any outside packaging and labeling used in the retail sale?    | Yes       | Yes    | Yes    | Yes | Yes       | Yes    | Yes    | Yes   | Yes    | No     | Yes   | Yes | Yes       | Yes   | Yes   | No    | Yes       |
| Do health warnings on cigarette packaging describe the harmful effects of tobacco use on health?                       | Yes       | Yes    | Yes    | Yes | Yes       | Yes    | Yes    | Yes   | Yes    | Yes    | Yes   | Yes | Yes       | Yes   | Yes   | Yes   | Yes       |
| Does the law mandate font style, font size and colour of health warnings on cigarette packaging?                       | Yes       | Yes    | Yes    | Yes | Yes       | Yes    | Yes    | Yes   | Yes    | Yes    | Yes   | Yes | Yes       | Yes   | No    | Yes   | Yes       |
| Are the health warnings on cigarette packaging rotating?                                                               | Yes       | Yes    | Yes    | Yes | Yes       | Yes    | Yes    | Yes   | Yes    | Yes    | Yes   | Yes | Yes       | Yes   | Yes   | Yes   | Yes       |
| Are the health warnings on cigarette packaging written in the principal language(s) of the country?                    | Yes       | Yes    | Yes    | Yes | Yes       | Yes    | Yes    | Yes   | Yes    | Yes    | Yes   | Yes | Yes       | Yes   | Yes   | Yes   | Yes       |
| Do the health warnings on cigarette packaging include a photograph or graphic?                                         | Yes       | Yes    | Yes    | No  | No        | Yes    | No     | No    | Yes    | Yes    | Yes   | Yes | Yes       | No    | No    | No    | Yes       |
| Last updated: 2015-08-14                                                                                               |           |        |        |     |           |        |        |       |        |        |       |     |           |       |       |       |           |
| <b>Anti-tobacco mass media campaigns (Not Applicable = NA)</b>                                                         |           |        |        |     |           |        |        |       |        |        |       |     |           |       |       |       |           |
| At least one national mass media campaign ran during the survey period                                                 | Yes       | Yes    | NA     | Yes | NA        | Yes    | NA     | Yes   | Yes    | Yes    | NA    | Yes | Yes       | Yes   | NA    | Yes   | Yes       |
| Campaign was part of a comprehensive tobacco control programme                                                         | Yes       | Yes    | NA     | Yes | NA        | Yes    | NA     | Yes   | Yes    | Yes    | NA    | Yes | Yes       | Yes   | NA    | Yes   | Yes       |
| Campaign was pre-tested                                                                                                | No        | No     | NA     | Yes | NA        | No     | NA     | No    | Yes    | Yes    | NA    | Yes | Yes       | Yes   | NA    | No    | Yes       |
| Formative research was conducted                                                                                       | Yes       | Yes    | NA     | Yes | NA        | Yes    | NA     | Yes   | Yes    | Yes    | NA    | Yes | Yes       | No    | NA    | Yes   | Yes       |
| Campaign aired on television and/or radio                                                                              | Yes       | No     | NA     | Yes | NA        | Yes    | NA     | Yes   | Yes    | Yes    | NA    | Yes | Yes       | Yes   | NA    | Yes   | Yes       |
| Campaign utilized media planning                                                                                       | Yes       | Yes    | NA     | Yes | NA        | Yes    | NA     | Yes   | Yes    | Yes    | NA    | Yes | Yes       | Yes   | NA    | Yes   | Yes       |
| Earned media/public relations were used to promote the campaign                                                        | No        | Yes    | NA     | Yes | NA        | Yes    | NA     | No    | Yes    | Yes    | NA    | Yes | Yes       | Yes   | NA    | Yes   | Yes       |
| Process evaluation was employed to assess implementation                                                               | Yes       | Yes    | NA     | Yes | NA        | Yes    | NA     | No    | Yes    | Yes    | NA    | Yes | Yes       | Yes   | NA    | Yes   | Yes       |
| Last updated: 2015-08-19                                                                                               |           |        |        |     |           |        |        |       |        |        |       |     |           |       |       |       |           |

**Table 6 Raise taxes on tobacco in 17 hosting Olympic games countries**

|           | Most sold brand of<br>cigarettes - price in<br>international<br>dollars (\$) | Average -<br>cigarette price<br>in international<br>dollars (\$) | Most sold brand<br>of cigarettes -<br>taxes as a % of<br>price - total tax | Average - taxes<br>as a % of<br>cigarette price -<br>total tax | Cigarettes are<br>less affordable in<br>2014 compared<br>to 2008 |
|-----------|------------------------------------------------------------------------------|------------------------------------------------------------------|----------------------------------------------------------------------------|----------------------------------------------------------------|------------------------------------------------------------------|
| Greece    | 5.95                                                                         | 5.75                                                             | 80.0                                                                       | 81.6                                                           | Yes                                                              |
| UK        | 11.01                                                                        | 11.2                                                             | 82.2                                                                       | 81.3                                                           | Yes                                                              |
| France    | 7.76                                                                         | 7.61                                                             | 80.3                                                                       | 80.6                                                           | Yes                                                              |
| Spain     | 6.82                                                                         | 6.39                                                             | 78.1                                                                       | 78.8                                                           | Yes                                                              |
| Italy     | 5.82                                                                         | 5.43                                                             | 75.7                                                                       | 76.1                                                           | Yes                                                              |
| Austria   | 5.63                                                                         | 5.34                                                             | 74.0                                                                       | 74.9                                                           | Yes                                                              |
| Singapore | 12.31                                                                        | 11.04                                                            | 66.2                                                                       | 73.8                                                           | No                                                               |
| Argentina | 3.42                                                                         | 3.47                                                             | 69.8                                                                       | 69.7                                                           | Yes                                                              |
| Norway    | 8.99                                                                         | 9.31                                                             | 68.8                                                                       | 67.2                                                           | Yes                                                              |
| Canada    | 7.5                                                                          | 6.88                                                             | 69.8                                                                       | 64.5                                                           | Yes                                                              |
| Brazil    | 2.75                                                                         | 2.85                                                             | 64.9                                                                       | 64.3                                                           | Yes                                                              |
| Japan     | 4.22                                                                         | 4.34                                                             | 64.4                                                                       | 62.9                                                           | Yes                                                              |
| Korea     | 3.14                                                                         | 3.24                                                             | 62.0                                                                       | 60.3                                                           | No                                                               |
| Australia | 10.99                                                                        | 10.64                                                            | 56.8                                                                       | 58.4                                                           | Yes                                                              |
| Russia    | 2.42                                                                         | 2.18                                                             | 47.6                                                                       | 50.5                                                           | Yes                                                              |
| China     | 2.33                                                                         | 2.13                                                             | 44.4                                                                       | 47.8                                                           | Yes                                                              |
| USA       | 6.23                                                                         | 6.07                                                             | 42.5                                                                       | 42.9                                                           | Yes                                                              |

Last updated: 2015-09-04
